# Supplementary material for: Organic solvent-assisted co-precipitation synthesis of red-emitting K2TiF6:Mn phosphors with improved quantum efficiency and optimized morphology
Source: Royal Society of Chemistry journal article supplement (doi:10.1039/d1dt03679c), 2021-12-13
Supplement: d1dt03679c1.pdf [file d1dt03679c1.pdf]

## **Organic solvent-assisted co-precipitation synthesis of a red-emitting $\text{K}_2\text{TiF}_6:\text{Mn}$ phosphors of improved quantum efficiency and optimized morphology**

Bojana Milićević,<sup>ab</sup> Yingyuan Chen,<sup>a</sup> Junhao Li,<sup>c</sup> Miroslav D. Dramićanin,<sup>b</sup> Jianbang Zhou<sup>\*a</sup> and Mingmei Wu<sup>\*a</sup>

<sup>a</sup> School of Marine Sciences/School of Chemistry, Sun Yat-Sen University, Zhuhai 519082, Guangzhou 510275, PR China.

<sup>b</sup> Vinca Institute of Nuclear Sciences – National Institute of the Republic of Serbia, University of Belgrade, PO Box 522, 11001 Belgrade, Serbia.

<sup>c</sup> Guangdong Province Key Laboratory of Rare Earth Development and Application, Institute of Rare Metals, Guangdong Academy of Sciences, Guangzhou 510651, P. R. China.

**Table S1.** Quantities of chemicals added to the reaction mixture to prepare  $K_2TiF_6 \cdot xat.\% Mn^{4+}$  ( $x = 0.05, 0.15, 0.25, 0.5$  and  $1$ ).

|                  | <b>Mn<sup>4+</sup> content (at. %)</b> |             |             |            |            |
|------------------|----------------------------------------|-------------|-------------|------------|------------|
|                  | <b>0.05</b>                            | <b>0.15</b> | <b>0.25</b> | <b>0.5</b> | <b>1.0</b> |
| $K_2MnF_6$       | 0.0014 g                               | 0.0042 g    | 0.0069 g    | 0.0139 g   | 0.0278 g   |
| TiO <sub>2</sub> |                                        |             | 0.1 g       |            |            |
| 48% HF           |                                        |             | 3.0 ml      |            |            |
| KF               |                                        |             | 0.1452 g    |            |            |
| Ethanol /        |                                        |             |             |            |            |
| 1-propanol /     |                                        |             | 1 ml        |            |            |
| n-butanol        |                                        |             |             |            |            |

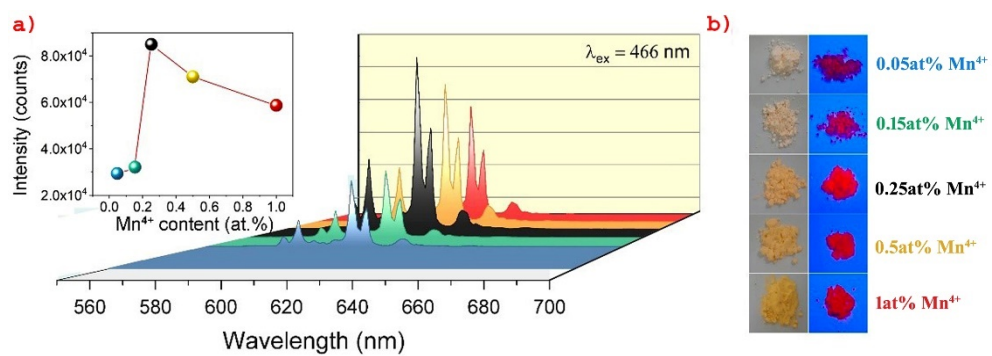

**Fig. S1** Room temperature emission spectra of  $K_2TiF_6-xat.\% Mn^{4+}$  ( $x = 0.05, 0.15, 0.25, 0.5$  and  $1$ ) phosphors and concentration-dependent emission intensity (b). Appearance of phosphors under daylight and 365 nm UV-light excitation (c).
